# Supplementary material for: Characterization of emergent toxigenic M1UK Streptococcus pyogenes and associated sublineages
Source: PubMed Central journal article supplement (PMC10210942; doi:10.1099/mgen.0.000994), 2023-04-24
Supplement: mgen-9-994-s001.pdf [file mgen-9-994-s001.pdf]

## Supplementary file for manuscript: Characterisation of emergent toxigenic M1<sub>UK</sub> *Streptococcus pyogenes* and associated sublineages

Ho Kwong Li\*, Xiangyun Zhi\*, Ana Vieira, Harry Whitwell, Amelia Schrickler, Elita Jauneikaite, Hanqi Li, Ahmed Yosef, Ivan Andrew, Laurence Game, Claire E. Turner, Theresa Lamagni, Juliana Coelho, Shiranee Sriskandan

### CONTENTS

- Supplementary Figure S1 Real-time PCR measurement of *glpF2* transcription
- Supplementary Figure S2 GldA operon in different species
- Supplementary Figure S3 SpeA production by non-invasive *emm1* *S. pyogenes*
- Supplementary Figure S4 String analysis of proteomic data: M1<sub>global</sub> vs. M1<sub>UK</sub> cellular fractions
- Supplementary Figure S5 String analysis of proteomic data: four M1 sublineages compared
  
- Supplementary Table S1 Strains used in experimental work
- Supplementary Table S2 Strains and WGS used for phylogenetic tree and SpeA quantification
- Supplementary Table S3 Chemically-defined medium composition
- Supplementary Table S4 Primers used for RT-qPCR

### Supplied in Figshare

- Excel Suppl. Files Pairwise proteomic comparisons used for Volcano plots Figures 5 and 6
- Numbers Files Proteomic comparisons for individual strains (5 per group)
  - Expt 1. M1<sub>global</sub> vs. M1<sub>UK</sub> cellular fractions (5 per group)
  - Expt 2. Four M1 sublineages compared (5 per group)

Supplementary figures

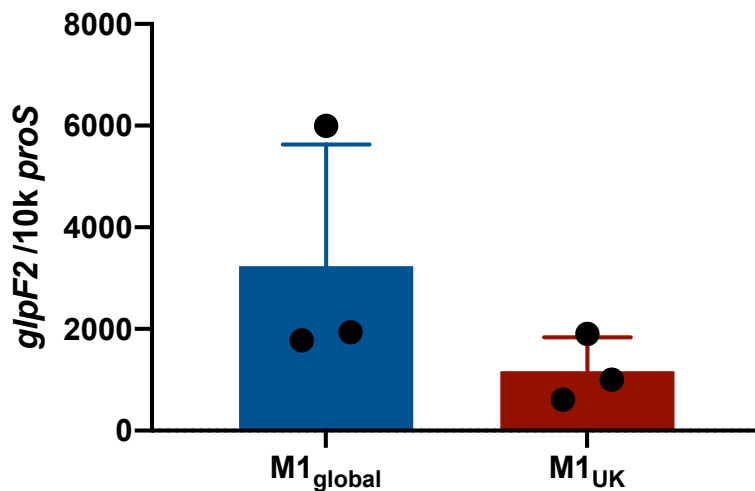

**Supplementary Figure S1.** Quantitative real-time PCR measurement of *glpF2* transcription in n=3 strains of *S. pyogenes* per lineage. Individual data points represent the average of 3 technical replicates for each strain. Strains used were: M1<sub>global</sub> (blue bar) (BHS0162; BHS0130; BHS0674) and M1<sub>UK</sub> (red bar) (BHS0258; BHS0170; BHS0128)

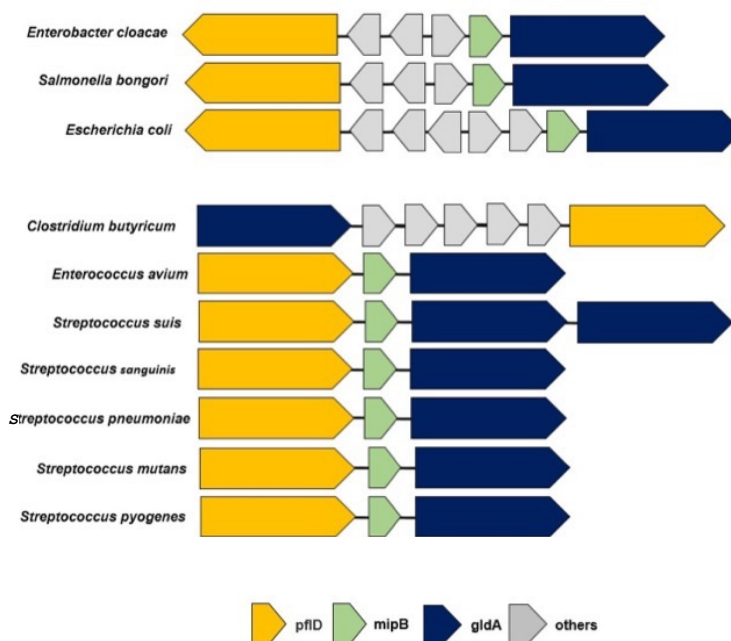

**Supplementary Figure S2** *GldA* operon in different species. Informatic analysis of publicly available genomes from a range of bacterial species demonstrated remarkable conservation of the genes and organisation of this region in all members of the streptococcaciae. Whereas other bacterial species possessed the three genes *mipB* (also annotated as *talC*, for transaldolase), *pflD* and *gldA*, the organisation of genes differed from the sequence observed in streptococci.

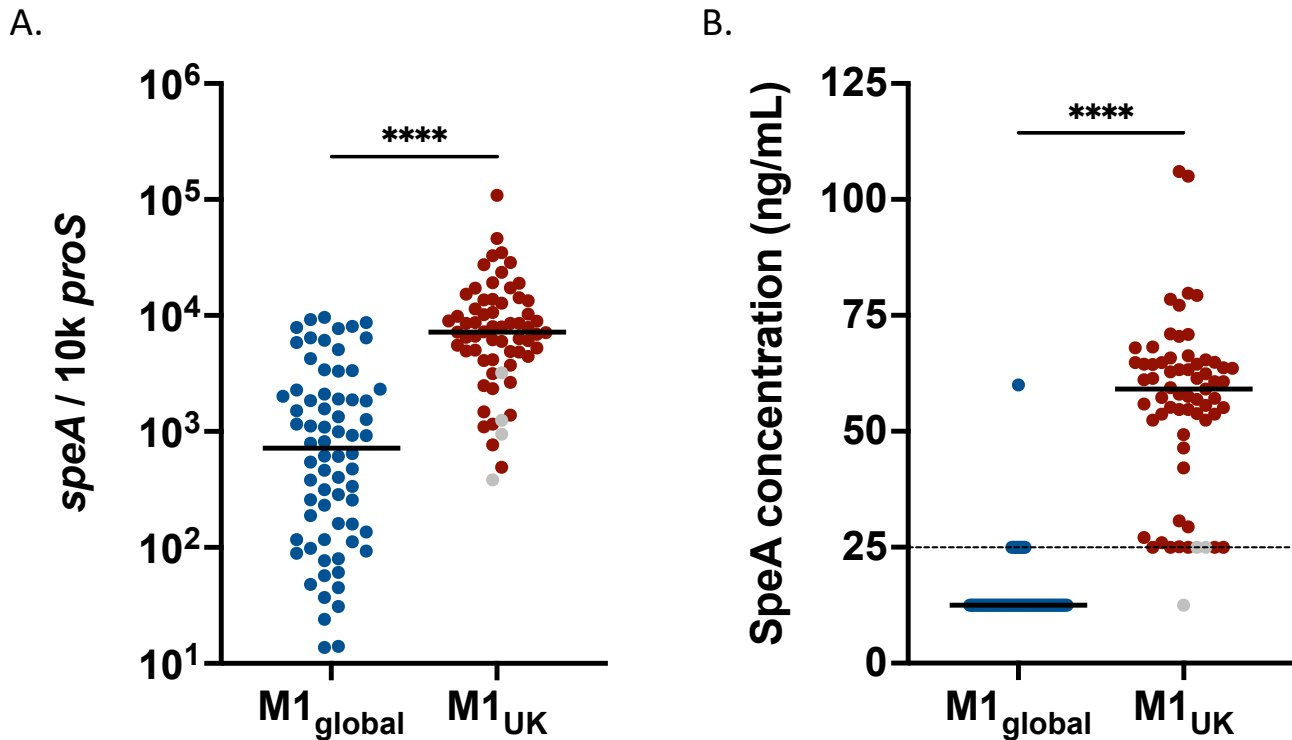

**Supplementary Figure S3.** Measurement of SpeA production by non-invasive *emm1* *S. pyogenes* isolates, (A), Quantitative real-time PCR measurement of *speA* transcription in M1<sub>global</sub> and M1<sub>UK</sub> strains of *S. pyogenes* per lineage (previously published in Lynskey N. & Jauneikaite E. et al, *Lancet Infect Dis*, 2019 Nov; 19(11): 1209-1218, shown for reference only). (B) Semi quantitative measurement of SpeA expression by western blotting. N=135 strains. Solid line represents the median, dashed line represents the limit of detection. Strains with undetectable SpeA assigned value of 12.5 ng/mL. The two top-producing M1<sub>UK</sub> strains in panel B represent 2 of 3 strains with mutations in *covRS*. Grey dots indicate an intermediate sublineage of M1. Unpaired T-test, \*\*\*\* is p<0.0001.

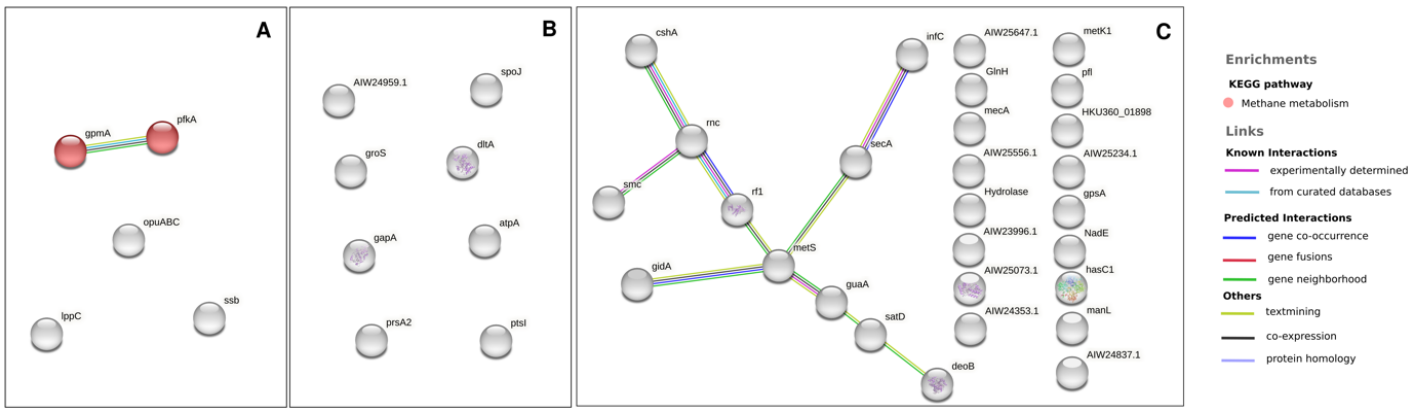

**Supplementary Figure S4. Enrichment and protein-protein interactions of differentially expressed proteins ( $p$ -value < 0.05) in different bacterial fractions using String database.** Coloured lines represent physical associations as described in the legend above. Coloured bubbles represent the type of enrichment observed. Data compare M1<sub>UK</sub> and M1<sub>global</sub> Supernatants (A); Cell wall extracts (B); Cytosol extracts (C) obtained from *S. pyogenes* strains cultured in chemically defined medium (CDM). (N=5 different strains per group). Pairwise comparisons are provided in supplementary Excel file.

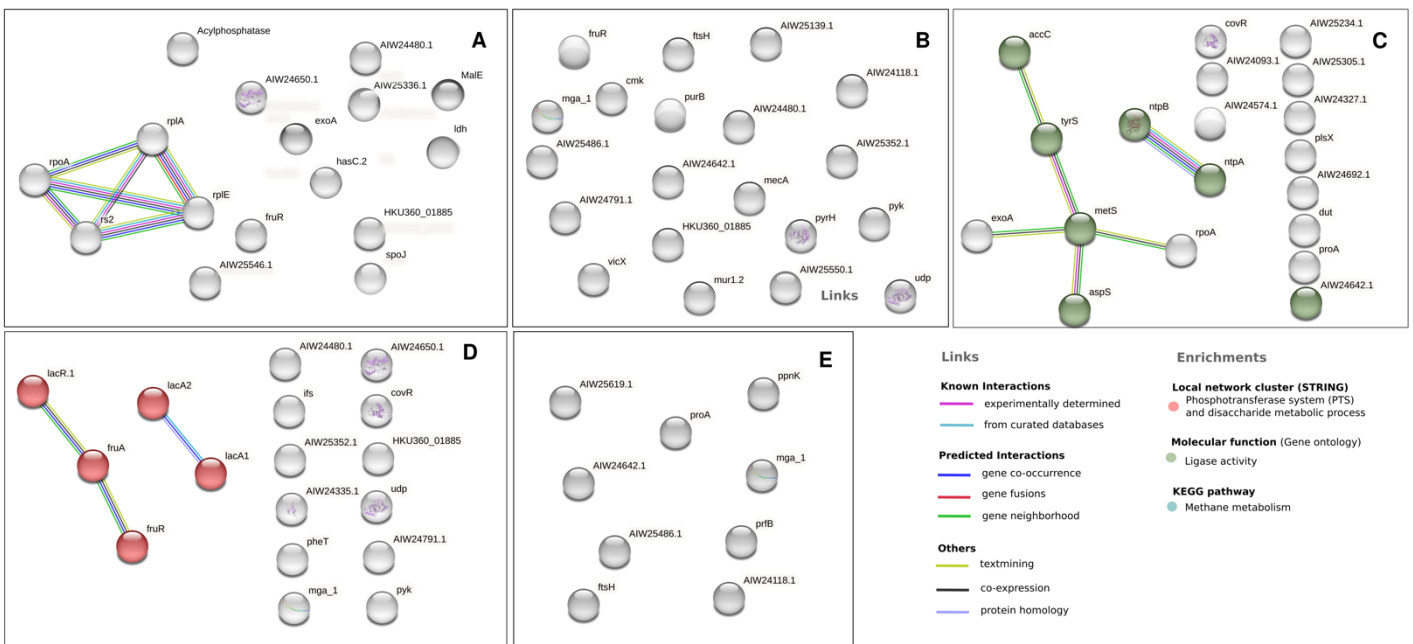

**Supplementary Figure S5. Enrichment and protein-protein interactions of differentially expressed proteins (cytosol only,  $p$ -value < 0.05) using String database comparing strains from four sublineages M1<sub>UK</sub>; M1<sub>23SNPs</sub>; M1<sub>13SNPs</sub>; and M1<sub>global</sub> cultured in CDM (N=5 per group).** Coloured lines represent physical associations as described in the legend above. Coloured bubbles represent the type of enrichment observed. Associations shown represent: (A) All 4 groups compared, (B) M1<sub>global</sub> vs M1<sub>UK</sub>, (C) [M1<sub>UK</sub>+M1<sub>23SNPs</sub>] vs [M1<sub>13SNPs</sub> + M1<sub>global</sub>], (D) M1<sub>global</sub> vs all others, (E) M1<sub>UK</sub> vs all others. Pairwise comparisons are provided in supplementary Excel file.

Supplementary tables

**Supplementary Table S1. Bacterial strains used in RNA sequencing and RT-PCR**

|                            | Accession¶ | Strain identifier | Lineage              | Year | RNAseq | gldA operon | glpF2 |
|----------------------------|------------|-------------------|----------------------|------|--------|-------------|-------|
| <b>M1<sub>global</sub></b> | ERS1020620 | BHS0674           | M1 <sub>global</sub> | 2015 | Y      | Y           | Y     |
|                            | ERS1020158 | BHS0162           | M1 <sub>global</sub> | 2012 | Y      | Y           | Y     |
|                            | ERS1020095 | BHS0130           | M1 <sub>global</sub> | 2011 | Y      | Y           | Y     |
|                            | ERS1020136 | BHS0151 or H1488  | M1 <sub>global</sub> | 2012 | Y      |             |       |
|                            | ERS1020472 | BHS0503           | M1 <sub>global</sub> | 2010 |        | Y           |       |
|                            | ERS1020045 | BHS0013           | M1 <sub>global</sub> | 2009 |        | Y           |       |
|                            | ERS1020385 | BHS0368           | M1 <sub>global</sub> | 2009 |        | Y           |       |
|                            | ERS1020523 | BHS0448           | M1 <sub>global</sub> | 2009 |        | Y           |       |
|                            |            |                   |                      |      |        |             |       |
| <b>M1<sub>UK</sub></b>     | ERS1020174 | BHS0170           | M1 <sub>UK</sub>     | 2012 | Y      | Y           | Y     |
|                            | ERS1020090 | BHS0128           | M1 <sub>UK</sub>     | 2011 | Y      | Y           | Y     |
|                            | ERS1020341 | BHS0258           | M1 <sub>UK</sub>     | 2014 | Y      | Y           | Y     |
|                            | ERS1020603 | BHS0581           | M1 <sub>UK</sub>     | 2015 | Y      |             |       |
|                            | ERS1020508 | BHS0521           | M1 <sub>UK</sub>     | 2015 |        | Y           |       |
|                            | ERS1020714 | BHS0643           | M1 <sub>UK</sub>     | 2015 |        | Y           |       |
|                            | ERS1463088 | BHS0762           | M1 <sub>UK</sub>     | 2016 |        | Y           |       |

¶Accession numbers relate to genome sequences deposited in the European nucleotide archive

**Supplementary Table S2.** *S. pyogenes* strains and genome sequences used to create phylogenetic tree (Figure 2) and used to quantify SpeA expression by non-invasive and invasive strains.

| ENA <sup>††</sup> | STUDY                               | DISEASE   | LINEAGE  | LOCATION | YEAR |
|-------------------|-------------------------------------|-----------|----------|----------|------|
| ERR2864947        | Sharma <i>et al.</i>                | Unknown   | M1global | UK       | 2017 |
| ERR2864949        | Sharma <i>et al.</i>                | Unknown   | M1global | UK       | 2017 |
| ERR2864951        | Sharma <i>et al.</i>                | Unknown   | M1global | UK       | 2017 |
| ERR2864964        | Sharma <i>et al.</i>                | Unknown   | M1global | UK       | 2017 |
| ERR2864950        | Sharma <i>et al.</i>                | Outbreak  | 23 SNPs  | UK       | 2017 |
| ERR2864953        | Sharma <i>et al.</i>                | Outbreak  | 23 SNPs  | UK       | 2017 |
| ERR2864957        | Sharma <i>et al.</i>                | Outbreak  | 22 SNPs  | UK       | 2017 |
| ERR2864962        | Sharma <i>et al.</i>                | Outbreak  | 23 SNPs  | UK       | 2017 |
| ERR2864966        | Sharma <i>et al.</i>                | Outbreak  | 23 SNPs  | UK       | 2017 |
| ERR2864969        | Sharma <i>et al.</i>                | Outbreak  | 23 SNPs  | UK       | 2017 |
| ERR2864948        | Sharma <i>et al.</i>                | Unknown   | M1uk     | UK       | 2017 |
| ERR2864952        | Sharma <i>et al.</i>                | Unknown   | M1uk     | UK       | 2017 |
| ERR2864954        | Sharma <i>et al.</i>                | Unknown   | M1uk     | UK       | 2017 |
| ERR2864955        | Sharma <i>et al.</i>                | Unknown   | M1uk     | UK       | 2017 |
| ERR2864956        | Sharma <i>et al.</i>                | Unknown   | M1uk     | UK       | 2017 |
| ERR2864958        | Sharma <i>et al.</i>                | Unknown   | M1uk     | UK       | 2017 |
| ERR2864959        | Sharma <i>et al.</i>                | Unknown   | M1uk     | UK       | 2017 |
| ERR2864960        | Sharma <i>et al.</i>                | Unknown   | M1uk     | UK       | 2017 |
| ERR2864961        | Sharma <i>et al.</i>                | Unknown   | M1uk     | UK       | 2017 |
| ERR2864963        | Sharma <i>et al.</i>                | Unknown   | M1uk     | UK       | 2017 |
| ERR2864965        | Sharma <i>et al.</i>                | Unknown   | M1uk     | UK       | 2017 |
| ERR2864967        | Sharma <i>et al.</i>                | Unknown   | M1uk     | UK       | 2017 |
| ERR2864968        | Sharma <i>et al.</i>                | Unknown   | M1uk     | UK       | 2017 |
| ERS4267588        | This Study                          | Outbreak  | 26 SNPs  | UK       | 2018 |
| ERS4267589        | This Study                          | Outbreak  | 27 SNPs  | UK       | 2018 |
| CP000017.2        | Sumby <i>et al.</i>                 | Reference | M1global | x        | x    |
| ERS1448799        | Kapatai <i>et al.</i>               | Invasive  | 13 SNPs  | UK       | 2014 |
| ERS1450651        | Kapatai <i>et al.</i>               | Invasive  | 13 SNPs  | UK       | 2015 |
| ERS1450822        | Kapatai <i>et al.</i>               | Invasive  | 13 SNPs  | UK       | 2015 |
| ERS1448193        | Kapatai <i>et al.</i>               | Invasive  | 23 SNPs  | UK       | 2014 |
| ERS1450815        | Kapatai <i>et al.</i>               | Invasive  | 23 SNPs  | UK       | 2015 |
| ERS1448173        | Kapatai <i>et al.</i>               | Invasive  | M1global | UK       | 2014 |
| ERS1448879        | Kapatai <i>et al.</i>               | Invasive  | M1global | UK       | 2014 |
| ERS1450607        | Kapatai <i>et al.</i>               | Invasive  | M1global | UK       | 2015 |
| ERS1450839        | Kapatai <i>et al.</i>               | Invasive  | M1global | UK       | 2015 |
| ERS1448481        | Kapatai <i>et al.</i>               | Invasive  | M1uk     | UK       | 2014 |
| ERS1449006        | Kapatai <i>et al.</i>               | Invasive  | M1uk     | UK       | 2014 |
| ERS1450390        | Kapatai <i>et al.</i>               | Invasive  | M1uk     | UK       | 2015 |
| ERS1450879        | Kapatai <i>et al.</i>               | Invasive  | M1uk     | UK       | 2015 |
| ERS1594714        | Lynskey & Jauneikaite <i>et al.</i> | Invasive  | 13 SNPs  | UK       | 2013 |
| ERS1594852        | Lynskey & Jauneikaite <i>et al.</i> | Invasive  | 13 SNPs  | UK       | 2013 |
| ERS1594863        | Lynskey & Jauneikaite <i>et al.</i> | Invasive  | 13 SNPs  | UK       | 2013 |
| ERS1594843        | Lynskey & Jauneikaite <i>et al.</i> | Invasive  | 13 SNPs  | UK       | 2013 |
| ERS1594990        | Lynskey & Jauneikaite <i>et al.</i> | Invasive  | 13 SNPs  | UK       | 2016 |
| ERS1594904        | Lynskey & Jauneikaite <i>et al.</i> | Invasive  | 13 SNPs  | UK       | 2016 |
| ERS1594914        | Lynskey & Jauneikaite <i>et al.</i> | Invasive  | 13 SNPs  | UK       | 2016 |
| ERS1594824        | Lynskey & Jauneikaite <i>et al.</i> | Invasive  | 23 SNPs  | UK       | 2013 |
| ERS1594734        | Lynskey & Jauneikaite <i>et al.</i> | Invasive  | 23 SNPs  | UK       | 2013 |
| ERS1594744        | Lynskey & Jauneikaite <i>et al.</i> | Invasive  | 23 SNPs  | UK       | 2013 |
| ERS1594757        | Lynskey & Jauneikaite <i>et al.</i> | Invasive  | 23 SNPs  | UK       | 2013 |
| ERS1594864        | Lynskey & Jauneikaite <i>et al.</i> | Invasive  | 23 SNPs  | UK       | 2013 |
| ERS1594882        | Lynskey & Jauneikaite <i>et al.</i> | Invasive  | 23 SNPs  | UK       | 2013 |
| ERS1594950        | Lynskey & Jauneikaite <i>et al.</i> | Invasive  | 23 SNPs  | UK       | 2016 |









|           |                      |          |          |    |      |
|-----------|----------------------|----------|----------|----|------|
| ERS362145 | Turner <i>et al.</i> | Invasive | M1global | UK | 2011 |
| ERS362146 | Turner <i>et al.</i> | Invasive | M1uk     | UK | 2011 |
| ERS362147 | Turner <i>et al.</i> | Invasive | M1uk     | UK | 2011 |
| ERS362165 | Turner <i>et al.</i> | Invasive | M1global | UK | 2011 |
| ERS362031 | Turner <i>et al.</i> | Invasive | M1global | UK | 2005 |
| ERS362033 | Turner <i>et al.</i> | Invasive | M1global | UK | 2005 |
| ERS362040 | Turner <i>et al.</i> | Invasive | M1global | UK | 2005 |
| ERS362047 | Turner <i>et al.</i> | Invasive | M1global | UK | 2005 |
| ERS362051 | Turner <i>et al.</i> | Invasive | M1global | UK | 2006 |
| ERS362058 | Turner <i>et al.</i> | Invasive | M1global | UK | 2006 |
| ERS362063 | Turner <i>et al.</i> | Invasive | M1global | UK | 2006 |
| ERS362066 | Turner <i>et al.</i> | Invasive | M1global | UK | 2006 |
| ERS362067 | Turner <i>et al.</i> | Invasive | M1global | UK | 2006 |
| ERS362071 | Turner <i>et al.</i> | Invasive | 13 SNPs  | UK | 2006 |
| ERS362110 | Turner <i>et al.</i> | Invasive | M1global | UK | 2003 |
| ERS362122 | Turner <i>et al.</i> | Invasive | M1global | UK | 2005 |
| ERS362029 | Turner <i>et al.</i> | Invasive | M1global | UK | 2005 |
| ERS361855 | Turner <i>et al.</i> | Invasive | M1global | UK | 2001 |
| ERS361867 | Turner <i>et al.</i> | Invasive | M1global | UK | 2002 |
| ERS361913 | Turner <i>et al.</i> | Invasive | M1global | UK | 2004 |
| ERS361937 | Turner <i>et al.</i> | Invasive | M1global | UK | 2004 |
| ERS361941 | Turner <i>et al.</i> | Invasive | M1global | UK | 2004 |
| ERS361950 | Turner <i>et al.</i> | Invasive | M1global | UK | 2004 |
| ERS361954 | Turner <i>et al.</i> | Invasive | M1global | UK | 2004 |
| ERS361960 | Turner <i>et al.</i> | Invasive | 13 SNPs  | UK | 2005 |
| ERS361966 | Turner <i>et al.</i> | Invasive | M1global | UK | 2004 |
| ERS361929 | Turner <i>et al.</i> | Invasive | M1global | UK | 2004 |
| ERS361826 | Turner <i>et al.</i> | Invasive | M1global | UK | 2001 |
| ERS361827 | Turner <i>et al.</i> | Invasive | M1global | UK | 2001 |
| ERS361841 | Turner <i>et al.</i> | Invasive | M1global | UK | 2001 |
| ERS361865 | Turner <i>et al.</i> | Invasive | M1global | UK | 2002 |
| ERS362030 | Turner <i>et al.</i> | Invasive | M1global | UK | 2005 |
| ERS362032 | Turner <i>et al.</i> | Invasive | M1global | UK | 2005 |
| ERS362049 | Turner <i>et al.</i> | Invasive | M1global | UK | 2005 |
| ERS362078 | Turner <i>et al.</i> | Invasive | M1global | UK | 2006 |
| ERS379360 | Turner <i>et al.</i> | Invasive | M1global | UK | 2006 |

¶ Non-invasive strains that were used in SpeA quantification (Supplementary figure 2) are highlighted by grey shading.

† Invasive strains representing four sublineages used for SpeA quantification are highlighted in blue shading

**Supplementary Table S3.** Components of chemically defined media (CDM) –

| COMPONENT <sup>1</sup>               | CONSTITUENT                                                                | STOCK CONC | VOLUME IN 500mL CDM |
|--------------------------------------|----------------------------------------------------------------------------|------------|---------------------|
| Water                                | n/a                                                                        | n/a        | 350                 |
| Iron                                 | Fe(NO <sub>3</sub> ) <sub>3</sub> .9H <sub>2</sub> O - 50mg                | 1000X      | 0.5                 |
|                                      | F <sub>2</sub> SO <sub>4</sub> .7H <sub>2</sub> O - 250mg                  |            |                     |
|                                      | made up to 50mL ddH <sub>2</sub> O                                         |            |                     |
| Phosphate                            | K <sub>2</sub> HPO <sub>4</sub> - 5g                                       | 25X        | 20                  |
|                                      | KH <sub>2</sub> PO <sub>4</sub> - 25g                                      |            |                     |
|                                      | NaH <sub>2</sub> PO <sub>4</sub> .H <sub>2</sub> O - 79.9g                 |            |                     |
|                                      | Na <sub>2</sub> HPO <sub>4</sub> .7H <sub>2</sub> O - 346.8g               |            |                     |
|                                      | made up to 1L ddH <sub>2</sub> O                                           |            |                     |
| MgSO <sub>4</sub> .7H <sub>2</sub> O | MgSO <sub>4</sub> .7H <sub>2</sub> O - 87.5g                               | 500X       | 1                   |
|                                      | made up to 250mL ddH <sub>2</sub> O                                        |            |                     |
| MnSO <sub>4</sub> .H <sub>2</sub> O  | MnSO <sub>4</sub> .H <sub>2</sub> O - 1.25g                                | 1000X      | 0.5                 |
|                                      | made up to 250mL ddH <sub>2</sub> O                                        |            |                     |
| Sodium acetate                       | NaC <sub>2</sub> H <sub>3</sub> O <sub>2</sub> .3H <sub>2</sub> O - 112.5g | 50X        | 10                  |
|                                      | made up to 500mL ddH <sub>2</sub> O                                        |            |                     |
| Calcium chloride                     | CaCl <sub>2</sub> .2H <sub>2</sub> O - 338mg                               | 1000X      | 0.5                 |
|                                      | made up to 50mL ddH <sub>2</sub> O                                         |            |                     |
| Sodium bicarbonate                   | NaHCO <sub>3</sub> - 50g                                                   | 20X        | 25                  |
|                                      | made up to 1L dd H <sub>2</sub> O                                          |            |                     |
| L-Cysteine HCl                       | Cysteine HCl - 16.25mg                                                     | 500X       | 1                   |
|                                      | made up to 50mL ddH <sub>2</sub> O                                         |            |                     |
| Bases                                | 2N HCl - 50mL                                                              | 100X       | 5                   |
|                                      | adenine - 0.5g                                                             |            |                     |
|                                      | guanine hydrochloride - 0.5g                                               |            |                     |
|                                      | uracil - 0.5g                                                              |            |                     |
|                                      | ddH <sub>2</sub> O - 200ml                                                 |            |                     |
| Vitamins                             | p-aminobenzoic acid - 10mg                                                 | 1000X      | 0.5                 |
|                                      | biotin - 10mg                                                              |            |                     |
|                                      | folic acid - 40mg                                                          |            |                     |
|                                      | nicotinamide - 50mg                                                        |            |                     |
|                                      | b-nicotinamide adenine dinucleotide phosphate - 125mg                      |            |                     |
|                                      | pantothenate calcium salt - 100mg                                          |            |                     |
|                                      | pyridoxal - 50mg                                                           |            |                     |
|                                      | pyridoxamine dihydrochloride - 50mg                                        |            |                     |
|                                      | riboflavin - 100mg                                                         |            |                     |
|                                      | thiamine hydrochloride - 50mg                                              |            |                     |
|                                      | vitamin B <sub>12</sub> - 5mg                                              |            |                     |
|                                      | dissolve in 50mL ddH <sub>2</sub> O                                        |            |                     |
| Amino acids                          | DL- alanine - 2.5g                                                         | 50X        | 10                  |

|               |                          |     |    |
|---------------|--------------------------|-----|----|
|               | L-arginine - 2.5g        |     |    |
|               | L-aspartic acid - 2.5g   |     |    |
|               | L-asparagine - 2.5g      |     |    |
|               | L-cystine 1.25g          |     |    |
|               | L-glutamic acid - 2.5g   |     |    |
|               | L-glutamine - 5.0g       |     |    |
|               | Glycine - 2.5g           |     |    |
|               | L-histidine - 2.5g       |     |    |
|               | L-isoleucine - 2.5g      |     |    |
|               | L-leucine - 2.5g         |     |    |
|               | L-lysine - 2.5g          |     |    |
|               | L-methionine - 2.5g      |     |    |
|               | L-phenylalanine - 2.5g   |     |    |
|               | L-proline - 2.5g         |     |    |
|               | hydroxy-L-proline - 2.5g |     |    |
|               | L-serine - 2.5g          |     |    |
|               | L-threonine - 5.0g       |     |    |
|               | L-tryptophan - 2.5g      |     |    |
|               | L-tyrosine - 2.5g        |     |    |
|               | L-valine - 2.5g          |     |    |
|               | made up to 500mL ddH2O   |     |    |
| Carbon source | e.g., glucose            | n/a | 5g |

<sup>¶</sup>adapted from van de Rijn and Kessler, *Infect Immun*, 27(2):444

**Supplementary Table S4.** Primers used for RT-qPCR

| <b>GENE</b> | <b>PRIMER</b> | <b>SEQUENCE</b>                 | <b>PRODUCT<br/>(bp)</b> |
|-------------|---------------|---------------------------------|-------------------------|
| gldA        | gldA_RTf      | GCCTCAGATAATGAAATCAGCC          | 121                     |
|             | gldA_RTR      | CAAGTAAGTCAGCGATAGCC            |                         |
| mipB        | mipB_RTf      | TAGGAGCACAAGCCATCAC             | 100                     |
|             | mipB_RTR      | TCCAATCCTTGCCAAAATC             |                         |
| pflD        | pflD_RTf      | CAAAAACGGCTAAACCAGAAC           | 118                     |
|             | pflD_RTR      | ATGAACCAGACAGATTGCAC            |                         |
| ptsIIc      | PTS_RTf       | GCAAAACATCATCAAGCCAATC          | 121                     |
|             | PTS_RTR       | CCCAGCAATCAGGAAAAGAC            |                         |
| glpF2       | glpF_RTf      | GCTATGGCTTAGGAGTTATG            | 120                     |
|             | glpF_RTR      | AGACGTGAGCCCATGGGAAC            |                         |
| speA        | speA_Fwd      | GAGGGGTAACAAATCATGAAGG          | 94                      |
|             | speA_Rv       | TCAAATGATAGGCTTTGGATACC         |                         |
| proS        | proS_Fwd      | TGAGTTTATTATGAAAGACGGCTATAGTTTC | 93                      |
|             | proS_Rv       | AATAGCTTCGTAAGCTTGACGATAATC     |                         |
